# Supplementary material
Source: PubMed Central journal article supplement (PMC3965743)
Supplement: 11606_2013_2744_MOESM1_ESM.pdf [file 11606_2013_2744_MOESM1_ESM.pdf]

## Supplemental Tables

### Supplemental Table A. Definitions of pregnancy, pregnancy complications, comorbid conditions, utilization outcomes, using ICD9-CM and CPT codes

|                                                                                                                                                                                                 |                                                                                                                                                                                                                                                                                                                                                                                                                                                                                     |
|-------------------------------------------------------------------------------------------------------------------------------------------------------------------------------------------------|-------------------------------------------------------------------------------------------------------------------------------------------------------------------------------------------------------------------------------------------------------------------------------------------------------------------------------------------------------------------------------------------------------------------------------------------------------------------------------------|
| Delivery definition to select cohort (18)                                                                                                                                                       | ICD-9-CM codes: 650 (normal delivery), 651 (multiple gestation), V27.0 (outcome of delivery, single liveborn), V27.1 (Outcome of delivery, single stillborn), V27.2 (Outcome of delivery, twins, both liveborn), V27.3 (Outcome of delivery, twins, 1 liveborn, 1 stillborn), V27.4 (Outcome of delivery, other multiple births, all liveborn), V27.5 (Outcome of delivery, other multiple births, all liveborn), V27.6 (Outcome of delivery, other multiple births, some liveborn) |
| Pregestational diabetes                                                                                                                                                                         | ICD-9-CM diagnosis code 250.** (diabetes mellitus) identified more than 20 weeks prior to delivery date (i.e. pregnancy weeks 1-19, not 20-40) <i>or</i> ICD-9-CM diagnosis code 648.0* > 20 weeks prior to delivery (i.e. pregnancy weeks 1-19, not 20-40) <i>or</i><br>A prescription claim for a diabetes medication (see definition below) more than 20 weeks prior to delivery (i.e. pregnancy weeks 1-20, not 21-40)                                                          |
| Gestational diabetes                                                                                                                                                                            | 648.8* (abnormal glucose tolerance in pregnancy) at any point in defined 40-weeks pregnancy period <i>OR</i> 250.** (diabetes mellitus) ≤ 20 weeks before delivery date (i.e. weeks 20-40) <i>OR</i> 648.0* (abnormal glucose tolerance in pregnancy) ≤ 20 weeks before delivery date (i.e. weeks 20-40)<br><i>and</i> not meeting criteria for “pre-gestational diabetes” above (if it meets the above criteria then it is defined as “pre-pregnancy diabetes”)                    |
| <b>Hypertensive disorders in pregnancy</b>                                                                                                                                                      |                                                                                                                                                                                                                                                                                                                                                                                                                                                                                     |
| Preeclampsia (mild or severe) & eclampsia                                                                                                                                                       | ICD-9-CM diagnosis codes: 642.4* (mild preeclampsia), 642.5 (severe preeclampsia); ICD-9-CM diagnosis codes: 642.6* (eclampsia)                                                                                                                                                                                                                                                                                                                                                     |
| Chronic hypertension                                                                                                                                                                            | ICD-9-CM diagnosis codes: 642.0* (benign essential hypertension complicating pregnancy), 642.2* (other preexisting hypertension complicating pregnancy)                                                                                                                                                                                                                                                                                                                             |
| Gestational hypertension                                                                                                                                                                        | ICD-9-CM diagnosis codes: 642.3* (transient hypertension in pregnancy) <i>or</i> 642.9* (unspecified hypertension complicating pregnancy) <i>and</i> not meeting above definition for “chronic hypertension”                                                                                                                                                                                                                                                                        |
| Preeclampsia or eclampsia superimposed on pre-existing hypertension                                                                                                                             | ICD-9-CM diagnosis codes: 642.7 or meeting definitions for both preeclampsia and chronic hypertension                                                                                                                                                                                                                                                                                                                                                                               |
| Preterm labor or delivery of preterm infant                                                                                                                                                     | ICD-9-CM diagnosis codes: 644.0 (threatened premature labor), 644.00 (Threatened premature labor unspecified as to episode of care), 644.03 (Threatened premature labor antepartum), 644.1 (Other threatened labor), 644.10 (other threatened labor unspecified as to episode of care), 644.13 (other threatened labor antepartum), 644.2* (early onset of delivery)                                                                                                                |
| <b>Definitions of utilization of care outcomes</b>                                                                                                                                              |                                                                                                                                                                                                                                                                                                                                                                                                                                                                                     |
| <i>Primary care outpatient visits:</i><br>One of the following 3 visit types with a designated primary care provider (e.g. family medicine, primary care nurse practitioner, internal medicine) |                                                                                                                                                                                                                                                                                                                                                                                                                                                                                     |
| Primary care outpatient visit                                                                                                                                                                   | CPT codes: 99201-99205 (new patient visit), 99211-99215 (established patient visit), 99024 (post-operative check), 99241-99245 (consultation), 99381-99387 (preventive medicine visit), 99384 (adolescent visit, age 12-17 years), 99394 (adolescent visit, age 12-17years)<br><i>and</i> a specialty code corresponding to any primary care provider (e.g. internal medicine, family medicine; MD, NP or PA)                                                                       |
| Office or other outpatient visit                                                                                                                                                                | CPT codes: 99201 - 99205- new pt visit; 99211 - 99215 – established patient<br>99024 - post-operative check up; 99241 - 99245- consultation                                                                                                                                                                                                                                                                                                                                         |

**Supplemental Table A. continued**

|                                                                                              |                                                                                                                                                                                                                                                                                                                                                                                                                                                                             |
|----------------------------------------------------------------------------------------------|-----------------------------------------------------------------------------------------------------------------------------------------------------------------------------------------------------------------------------------------------------------------------------------------------------------------------------------------------------------------------------------------------------------------------------------------------------------------------------|
| Preventive medicine visits                                                                   | CPT codes:99381-99387, 99391-99397, 99401-99404, 99411, 99412, 99420, 99429                                                                                                                                                                                                                                                                                                                                                                                                 |
| Adolescent medicine visits                                                                   | 99384: Adolescent (age 12 through 17 years); 99394: Adolescent (age 12 through 17 years)                                                                                                                                                                                                                                                                                                                                                                                    |
| <i>Postpartum obstetric care:</i>                                                            |                                                                                                                                                                                                                                                                                                                                                                                                                                                                             |
| Office or outpatient hospital location (Place of service =11 or 22), professional claim type |                                                                                                                                                                                                                                                                                                                                                                                                                                                                             |
| Either                                                                                       | Specialists visit within 3 months after delivery:<br>Obstetrics & Gynecology, Certified nurse midwife, Gynecologist, Family practice, Family practice OB/Gyn, certified nurse midwife, Maternal and fetal medicine, Nurse practitioner, Perinatology                                                                                                                                                                                                                        |
| Or claim including 1 or more of the following V-codes:                                       | V 24.1 - Postpartum care and examination of lactating mother<br>V24.2- Routine postpartum follow-up                                                                                                                                                                                                                                                                                                                                                                         |
| <i>Emergency room care</i>                                                                   |                                                                                                                                                                                                                                                                                                                                                                                                                                                                             |
|                                                                                              | CPT codes 99281-99285, 10040-69979 AND Place of service=23 (emergency room)                                                                                                                                                                                                                                                                                                                                                                                                 |
| <i>Prenatal care</i>                                                                         | Between estimated date of conception and delivery date, requiring ≥ 100 days of insurance coverage in pregnancy and claim from an office or outpatient hospital location (place of service =11 or 22), as a professional claim type, with one of the following specialists: Obstetrics & Gynecology, Certified nurse midwife, Gynecologist, Family practice, Family practice OB/Gyn, certified nurse midwife, Maternal and fetal medicine, Nurse practitioner, Perinatology |
| Receipt of early prenatal care                                                               | Above definition and required a prenatal care visit in ≥ 176 days of i.e. first 104 days of pregnancy (18)                                                                                                                                                                                                                                                                                                                                                                  |
| <i>Laboratory testing</i>                                                                    |                                                                                                                                                                                                                                                                                                                                                                                                                                                                             |
| Any glucose testing                                                                          | CPT codes for the following: BMP (80049), CMP (80054), HgBA1c (83036), GTT (82951), quantitative glucose (82947)                                                                                                                                                                                                                                                                                                                                                            |
| <i>Medications</i>                                                                           | Antihypertensive medications included the following classes of medications:<br>ACEI, ARB, diuretics, CCB, vasodilator, beta blockers, rennin inhibitors, and all combinations                                                                                                                                                                                                                                                                                               |
|                                                                                              | All insulin types                                                                                                                                                                                                                                                                                                                                                                                                                                                           |
|                                                                                              | All classes of oral hypoglycemic medications                                                                                                                                                                                                                                                                                                                                                                                                                                |

**Abbreviations:** ACEI=angiotensin converting enzyme inhibitors; ARB=angiotensin receptor blockers; CCB=calcium channel blockers, CPT: Current Procedural Terminology; ICD9-CM= International Classification of Diseases, Ninth Revision, Clinical Modification

**Supplemental table B.** Characteristics of the study sample by insurance type (Medicaid vs. commercial), and within Medicaid insurance group, by those who became eligible for Medicaid because of a pregnancy diagnosis (vs. those who met other eligibility criteria)

| Characteristic                                                       | Medicaid                                |                              |                   | Commercial       | p-value* |
|----------------------------------------------------------------------|-----------------------------------------|------------------------------|-------------------|------------------|----------|
|                                                                      | Eligible based on pregnancy<br>N=17,464 | Other eligibility<br>N=9,865 | Total<br>N=27,329 | Total<br>N=4,011 |          |
| Mean age at delivery, years (SD)                                     | 24.9 (5.6)                              | 23.4 (6.1)                   | 24.3 (5.8)        | 31.3 (4.5)       | <0.001   |
| <b>Age category (%)</b>                                              |                                         |                              |                   |                  |          |
| < 18                                                                 | 3.6%                                    | 14.9%                        | 7.65%             | 0.1%             | <0.001   |
| 18-24                                                                | 52.4%                                   | 48.9%                        | 51.2%             | 6.3%             |          |
| 25-29                                                                | 24.0%                                   | 19.6%                        | 22.4%             | 27.4%            |          |
| 30-34                                                                | 12.7%                                   | 10.4%                        | 11.9%             | 42.9%            |          |
| > 35                                                                 | 7.3%                                    | 6.3%                         | 7.0%              | 23.4%            |          |
| <b>Race / ethnicity (in Medicaid only)</b>                           |                                         |                              |                   |                  |          |
| African American, %                                                  | 33.0%                                   | 64.3%                        | 44.3%             | n/a              | n/a      |
| White, %                                                             | 38.5%                                   | 24.3%                        | 33.4%             | n/a              | n/a      |
| Hispanic, %                                                          | 5.5%                                    | 3.6%                         | 4.8%              | n/a              | n/a      |
| Other race, %                                                        | 23.1%                                   | 7.8%                         | 17.6%             | n/a              | n/a      |
| <b>Neighborhood level characteristics<sup>1</sup></b>                |                                         |                              |                   |                  |          |
| Mean proportion of African American residents, % (SD %)              | 28.6%<br>(24.4%)                        | 41.5%<br>(29.6%)             | 33.2%<br>(27.2%)  | 24.3%<br>(23.7%) | <0.001   |
| Mean proportion without high school diploma among age < 25, % (SD %) | 19.5%<br>(8.82%)                        | 24.2%<br>(10.6%)             | 21.2%<br>(9.8%)   | 16.9%<br>(10.2%) | <0.001   |
| Mean proportion of residents below federal poverty, % (SD %)         | 8.0%<br>(6.1%)                          | 12.3%<br>(9.1%)              | 9.56%<br>(7.6%)   | 7.1%<br>(7.3%)   | <0.001   |
| Mean proportion urban, % (SD %)                                      | 76.9%<br>(33.3%)                        | 85.7%<br>(27.1%)             | 80.1%<br>(31.5%)  | 93.8%<br>(17.5%) | <0.001   |
| <b>Pregnancy and delivery complications</b>                          |                                         |                              |                   |                  |          |
| Any hypertensive disorder in pregnancy, %                            | 15.8%                                   | 19.5%                        | 17.2%             | 11.96%           | 0.04     |
| Pre-eclampsia, % (mild or severe)                                    | 7.8%                                    | 9.5%                         | 8.4%              | 7.0%             | 0.002    |
| Eclampsia                                                            | 0.4%                                    | 0.7%                         | 0.5%              | 0.3%             | 0.07     |
| Chronic hypertension in pregnancy, %                                 | 5.6%                                    | 7.7%                         | 6.4%              | 6.6%             | 0.52     |
| Gestational hypertension                                             | 7.11%                                   | 7.5%                         | 7.2%              | 6.43%            | 0.07     |
| Gestational diabetes mellitus, %                                     | 9.30%                                   | 7.5%                         | 8.66%             | 12.44%           | <0.001   |
| Pre-pregnancy diabetes, %                                            | 1.01%                                   | 1.70%                        | 1.26%             | 1.94%            | <0.001   |
| Cesarean delivery, %                                                 | 27.4%                                   | 26.8%                        | 27.2%             | 33.2%            | <0.001   |
| Preterm delivery, %                                                  | 8.6%                                    | 11.4%                        | 9.6%              | 7.9%             | <0.001   |
| Multiple gestation, %                                                | 1.4%                                    | 1.7%                         | 1.5%              | 2.5%             | <0.001   |
| Stillborn birth, %                                                   | 0.3%                                    | 0.3%                         | 0.3%              | 0.2%             | 0.65     |
| <b>Drug use and smoking</b>                                          |                                         |                              |                   |                  |          |
| Any drug use                                                         | 3.2%                                    | 7.3%                         | 4.7%              | 0.2%             | <0.001   |
| Alcohol use                                                          | 0.3%                                    | 0.8%                         | 0.5%              | 0.1%             | <0.001   |
| Smoking                                                              | 26.2%                                   | 32.6%                        | 28.5%             | 15.5%            | <0.001   |

**Supplemental table B. continued**

| <b>Other co-morbid illnesses in pregnancy</b>                             |               |               |               |              |        |
|---------------------------------------------------------------------------|---------------|---------------|---------------|--------------|--------|
| Depression                                                                | 4.09%         | 7.28%         | 5.24%         | 6.11%        | 0.02   |
| Other mental disorders                                                    | 13.66%        | 19.92%        | 15.92%        | 8.13%        | <0.001 |
| Thyroid disease in pregnancy                                              | 2.09%         | 2.48%         | 2.23%         | 7.65%        | <0.001 |
| HIV                                                                       | 0.19%         | 1.08%         | 0.51%         | 0.12%        | <0.001 |
| Asthma                                                                    | 9.28%         | 16.33%        | 11.83%        | 8.45%        | <0.001 |
| Obesity                                                                   | 8.21%         | 12.86%        | 9.89%         | 7.23%        | <0.001 |
| <b>Insurance coverage</b>                                                 |               |               |               |              |        |
| Mean coverage prior to conception, days (SD)                              | 22.1 (54.4)   | 97.0 (84.5)   | 49.2 (75.9)   | 145.9 (65.0) | <0.001 |
| Proportion with ≥ 3 months of preconception coverage, %                   | 12.9%         | 55.23%        | 28.20%        | 82.25%       | <0.001 |
| Proportion with early pregnancy coverage (first 104 days of pregnancy), % | 72.0%         | 83.5%         | 76.1%         | 94.8%        | <0.001 |
| Mean coverage post-delivery, days (SD)                                    | 170.8 (118.7) | 316.4 (189.1) | 223.3 (129.5) | 324.1 (82.2) | <0.001 |
| Proportion with ≥ 6 months post-delivery coverage, %                      | 29.7%         | 88.2%         | 51.8%         | 89.7%        | <0.001 |

\* p-value between Total Medicaid and Total Commercial insurance groups
